# Supplementary material
Source: Research Square preprint supplement (doi:10.21203/rs.3.rs-10425133/v1)
Supplement: Supplementary file 1 [file 588a064bdd2418b2593e51c9.docx]

## Additional files

**Additional file 1.** *File format:* .pdf. *Title of data:* Supplementary Information (Supplementary Notes 1–6 and Supplementary Figures S1–S11). *Description of data:* Six thematic Supplementary Notes, each with its figures, in order of citation in the main text: Note 1, leaf proline (assay, Fig. S1); Note 2, sequencing and mapping quality control (Fig. S2); Note 3, differential-expression overview (Figs. S3–S4); Note 4, GO and KEGG gene-set enrichment (Figs. S5–S8); Note 5, qPCR validation and Sanger amplicon confirmation (Fig. S9); Note 6, reference-genome comparison of Cascade, Kew and Apollo (Figs. S10–S11).

**Additional file 2.** *File format:* .xlsx / .fasta. *Title of data:* Supplementary Tables ST1–ST15. *Description of data:* Processed datasets, one worksheet or file per table: ST1 leaf proline data; ST2 per-library sequencing/mapping QC; ST3 DEGs May (169); ST4 DEGs August (42); ST5 persistent core (11, May ∩ August); ST6 DEGs treatment-overall, season-averaged (353); ST7 GSEA GO/KEGG (May/August/treatment); ST8 ORA per timepoint (GO/KEGG); ST9 qPCR primers (forward/reverse sequence, length, GC %; all designed in this study); ST10 qPCR × RNA-seq correlation; ST11 Sanger amplicon consensus sequences (FASTA); ST12 Cascade↔Kew reciprocal best hits; ST13 DEGs shared Cascade ∩ Kew (20); ST14 GO and KEGG enrichment Cascade vs Kew; ST15 raw featureCounts and TMM-normalised counts.
