# Supplementary material
Source: Research Square preprint supplement (doi:10.21203/rs.3.rs-10425133/v1)
Supplement: Supplementary file 2 [file 8a4a2b59487b37dd23477e0e.xlsx]

## Sheet: Data
index	date	sample	wdh1	wdh2	wdh3	Average	ug_Prolin_500ul	ug_Prolin_ml	ug_Prolin_1,3mlExtract	ug_Prolin_gFW	prolin	viroid	chamber
1	20220803	1	0.2048	0.2018	0.2011	0.20257	2.607	5.214	6.78	135.57	135.57	CBCVd	DE
2	20220803	2	0.1462	0.1483	0.1438	0.1461	1.8803	3.761	4.89	108.64	108.64	CBCVd	DE
3	20220803	3	0.2385	0.2369	0.2467	0.2407	3.0978	6.196	8.05	178.98	178.98	CBCVd	DE
4	20220803	4	0.2481	0.2509	0.2467	0.24857	3.1991	6.398	8.32	184.83	184.83	CBCVd	DE
5	20220803	5	0.1156	0.1149	0.1123	0.11427	1.4706	2.941	3.82	84.97	84.97	CBCVd	DE
6	20220803	6	0.2618	0.2614	0.2573	0.26017	3.3483	6.697	8.71	174.11	174.11	CBCVd	DE
7	20220803	7	0.1851	0.1864	0.187	0.18617	2.396	4.792	6.23	138.43	138.43	CBCVd	DE
8	20220803	8	0.2569	0.2545	0.2539	0.2551	3.2831	6.566	8.54	189.69	189.69	CBCVd	DE
9	20220803	9	0.2915	0.2986	0.3009	0.297	3.8224	7.645	9.94	220.85	220.85	CBCVd	DE
10	20220803	10	0.1958	0.1922	0.1917	0.19323	2.4869	4.974	6.47	129.32	129.32	CBCVd	DE
11	20220803	11	0.2238	0.2277	0.2301	0.2272	2.9241	5.848	7.6	152.05	152.05	CBCVd	SL
12	20220803	12	0.3481	0.3482	0.3444	0.3469	4.4646	8.929	11.61	232.16	232.16	CBCVd	SL
13	20220803	13	0.2909	0.288	0.2827	0.2872	3.6963	7.393	9.61	160.17	160.17	CBCVd	SL
14	20220803	14	0.2941	0.3007	0.2953	0.2967	3.8185	7.637	9.93	198.56	198.56	CBCVd	SL
15	20220803	15	0.3522	0.3544	0.3572	0.3546	4.5637	9.127	11.87	237.31	237.31	CBCVd	SL
16	20220803	16	0.2883	0.2816	0.2783	0.28273	3.6388	7.278	9.46	189.22	189.22	CBCVd	SL
17	20220803	17	0.3035	0.3059	0.3056	0.305	3.9254	7.851	10.21	204.12	204.12	CBCVd	SL
18	20220803	18	0.3247	0.3228	0.3163	0.32127	4.1347	8.269	10.75	215	215	CBCVd	SL
19	20220803	19	0.4229	0.4095	0.4149	0.41577	5.3509	10.702	13.91	231.87	231.87	CBCVd	SL
20	20220803	20	0.2595	0.2637	0.2588	0.26067	3.3548	6.71	8.72	174.45	174.45	CBCVd	SL
21	20220803	1	0.2599	0.2543	0.2546	0.25627	3.1795	6.359	8.27	91.85	91.85	Control	DE
22	20220803	2	0.2146	0.2126	0.2006	0.20927	2.5964	5.193	6.75	122.74	122.74	Control	DE
23	20220803	3	0.2954	0.2983	0.2978	0.29717	3.6869	7.374	9.59	191.72	191.72	Control	DE
24	20220803	4	0.2364	0.2477	0.2838	0.25597	3.1758	6.352	8.26	150.13	150.13	Control	DE
25	20220803	5	0.6332	0.6349	0.6275	0.63187	7.8395	15.679	20.38	370.6	370.6	Control	DE
26	20220803	6	0.1741	0.1726	0.1783	0.175	2.1712	4.342	5.65	102.64	102.64	Control	DE
27	20220803	7	0.1852	0.186	0.1853	0.1855	2.3015	4.603	5.98	119.68	119.68	Control	DE
28	20220803	8	0.2748	0.2783	0.2776	0.2769	3.4355	6.871	8.93	162.4	162.4	Control	DE
29	20220803	9	0.1733	0.1813	0.1731	0.1759	2.1824	4.365	5.67	103.17	103.17	Control	DE
30	20220803	10	0.1761	0.1724	0.1694	0.17263	2.1419	4.284	5.57	92.81	92.81	Control	DE
31	20220803	11	0.2046	0.2073	0.2068	0.20623	2.5587	5.117	6.65	133.05	133.05	Control	SL
32	20220803	12	0.3051	0.2725	0.258	0.27853	3.4557	6.911	8.98	179.7	179.7	Control	SL
33	20220803	13	0.2609	0.2708	0.2674	0.26637	3.3048	6.61	8.59	171.85	171.85	Control	SL
34	20220803	14	0.2305	0.2365	0.2281	0.2317	2.8747	5.749	7.47	149.48	149.48	Control	SL
35	20220803	15	0.1632	0.1628	0.1814	0.16913	2.0984	4.197	5.46	109.12	109.12	Control	SL
36	20220803	16	0.2395	0.2398	0.2336	0.23763	2.9483	5.897	7.67	153.31	153.31	Control	SL
37	20220803	17	0.1955	0.1949	0.2023	0.19757	2.4512	4.902	6.37	127.46	127.46	Control	SL
38	20220803	18	0.3994	0.378	0.3923	0.3899	4.8375	9.675	12.58	251.55	251.55	Control	SL
39	20220803	19	0.2599	0.2635	0.2595	0.26097	3.2378	6.476	8.42	168.37	168.37	Control	SL
40	20220803	20	0.3203	0.3232	0.3196	0.32103	3.983	7.966	10.36	207.12	207.12	Control	SL
41	20220803	9	0.5155	0.4996	0.4992	0.50477	6.5215	13.043	16.96	339.12	339.12	CBCVd	DE
42	20220803	4	0.2316	0.236	0.2295	0.23237	3.0022	6.004	7.81	173.46	173.46	CBCVd	DE
43	20220803	19	0.1604	0.1531	0.1547	0.15607	2.0164	4.033	5.24	116.5	116.5	Control	SL
44	20220803	15	0.2046	0.2045	0.2002	0.2031	2.624	5.248	6.82	151.61	151.61	Control	SL
45	20220803	14	0.4227	0.4174	0.4168	0.41897	5.413	10.826	14.07	312.75	312.75	CBCVd	SL
46	20220803	8	0.4904	0.4735	0.4617	0.4752	6.1395	12.279	15.96	319.26	319.26	Control	DE
47	20220803	18	0.4493	0.4612	0.4558	0.45543	5.8842	11.768	15.3	339.97	339.97	CBCVd	SL
48	20220803	20	0.3269	0.3179	0.315	0.31993	4.1335	8.267	10.75	238.82	238.82	CBCVd	SL
49	20220803	5	0.647	0.6466	0.6439	0.64583	8.3441	16.688	21.69	482.1	482.1	Control	DE
50	20220803	14	0.3621	0.3583	0.3517	0.35737	4.6171	9.234	12	240.09	240.09	Control	SL
51	20220803	13	0.3452	0.3741	0.3663	0.36187	4.6753	9.351	12.16	243.11	243.11	Control	SL
52	20220803	17	0.3255	0.3298	0.3202	0.32517	4.2011	8.402	10.92	218.46	218.46	Control	SL
53	20220803	10	0.2922	0.294	0.2931	0.2931	3.7868	7.574	9.85	164.1	164.1	CBCVd	DE
54	20220803	11	0.4048	0.408	0.3909	0.40123	5.1839	10.368	13.48	269.56	269.56	CBCVd	SL
55	20220803	9	0.2082	0.2082	0.2039	0.20677	2.6714	5.343	6.95	138.91	138.91	Control	DE
56	20220803	12	0.4864	0.4775	0.4499	0.47127	6.0887	12.177	15.83	316.61	316.61	CBCVd	SL
57	20220803	8	0.3615	0.3538	0.3598	0.35837	4.6301	9.26	12.04	240.76	240.76	CBCVd	DE
58	20220803	15	0.2625	0.2609	0.2713	0.2649	3.4225	6.845	8.9	177.97	177.97	CBCVd	SL
59	20220803	3	0.3757	0.3718	0.3713	0.37293	4.8183	9.637	12.53	208.79	208.79	CBCVd	DE
60	20220803	7	0.4572	0.4541	0.4476	0.45297	5.8523	11.705	15.22	304.32	304.32	Control	DE
61	20220803	2	0.2494	0.2462	0.2414	0.24567	3.2625	6.525	8.48	173.11	173.11	CBCVd	DE
62	20220803	9	0.3038	0.3025	0.2897	0.29867	3.9664	7.933	10.31	202.21	202.21	Control	DE
63	20220803	7	0.4016	0.3914	0.3742	0.38907	5.1669	10.334	13.43	200.51	200.51	CBCVd	DE
64	20220803	6	0.4167	0.4128	0.4083	0.4126	5.4794	10.959	14.25	209.51	209.51	CBCVd	DE
65	20220803	4	0.2417	0.2384	0.2369	0.239	3.174	6.348	8.25	144.78	144.78	Control	DE
66	20220803	17	0.3558	0.3528	0.3487	0.35243	4.6804	9.361	12.17	225.35	225.35	CBCVd	SL
67	20220803	11	0.2825	0.2799	0.2716	0.278	3.6919	7.384	9.6	171.41	171.41	Control	SL
68	20220803	10	0.3646	0.3544	0.3509	0.35663	4.7362	9.472	12.31	178.46	178.46	Control	DE
69	20220803	20	0.6246	0.6054	0.5927	0.60757	8.0686	16.137	20.98	338.36	338.36	Control	SL
70	20220803	5	0.2981	0.2965	0.2837	0.29277	3.888	7.776	10.11	155.52	155.52	CBCVd	DE
71	20220803	1	0.2127	0.2088	0.2002	0.20723	2.7521	5.504	7.16	198.76	198.76	CBCVd	DE
72	20220803	13	0.2303	0.2325	0.2253	0.22937	3.046	6.092	7.92	219.99	219.99	CBCVd	SL
73	20220803	6	0.2627	0.2742	0.2408	0.25923	3.4427	6.885	8.95	142.08	142.08	Control	DE
74	20220803	19	0.3373	0.333	0.3121	0.32747	4.3488	8.698	11.31	213.34	213.34	CBCVd	SL
75	20220803	1	0.2624	0.2682	0.2576	0.26273	3.4892	6.978	9.07	104.27	104.27	Control	DE
76	20220803	3	0.2311	0.2287	0.2265	0.22877	3.0381	6.076	7.9	202.54	202.54	Control	DE
77	20220803	18	0.2655	0.2593	0.2538	0.25953	3.4467	6.893	8.96	172.33	172.33	Control	SL
78	20220803	16	0.1929	0.1939	0.1909	0.19257	2.5573	5.115	6.65	154.63	154.63	CBCVd	SL
79	20220803	2	0.1529	0.15	0.1463	0.14973	1.9885	3.977	5.17	92.32	92.32	Control	DE
80	20220803	16	0.245	0.259	0.2574	0.2538	3.3705	6.741	8.76	127.01	127.01	Control	SL
81	20220803	12	0.1986	0.2008	0.1924	0.19727	2.6197	5.239	6.81	158.4	158.4	Control	SL
82	20230526	11	0.1096	0.111	0.0974	0.106	1.77852	3.55705	4.62416	157.821	157.821	Control	SL
83	20230526	3	0.3633	0.3795	0.3731	0.371967	6.24105	12.4821	16.2267	117.585	117.585	Control	DE
84	20230526	1	0.198	0.202	0.2005	0.200167	3.3585	6.717	8.7321	97.2395	97.2395	Control	DE
85	20230526	8	0.2461	0.2407	0.2424	0.243067	4.0783	8.1566	10.6036	258.624	258.624	Control	DE
86	20230526	14	0.2215	0.2908	0.2839	0.2654	4.45302	8.90604	11.5779	132.017	132.017	Control	SL
87	20230526	19	0.1845	0.269	0.3346	0.2627	4.40772	8.81544	11.4601	211.051	211.051	Control	SL
88	20230526	4	0.1632	0.2173	0.2378	0.2061	3.45805	6.91611	8.99094	206.214	206.214	Control	DE
89	20230526	5	0.2632	0.2574	0.2565	0.259033	4.3462	8.69239	11.3001	175.196	175.196	Control	DE
90	20230526	20	0.2651	0.3008	0.2985	0.288133	4.83445	9.6689	12.5696	127.48	127.48	Control	SL
91	20230526	10	0.2854	0.3352	0.316	0.3122	5.23826	10.4765	13.6195	169.186	169.186	CBCVd	DE
92	20230526	16	0.1939	0.1599	0.1568	0.1702	2.8557	5.71141	7.42483	193.86	193.86	Control	SL
93	20230526	17	0.1186	0.2001	0.218	0.1789	3.00168	6.00336	7.80436	121.753	121.753	Control	SL
94	20230526	19	0.5811	0.6032	0.5439	0.576067	9.66555	19.3311	25.1304	1191.02	1191.02	CBCVd	SL
95	20230526	6	0.452	0.4143	0.4003	0.4222	7.08389	14.1678	18.4181	275.72	275.72	CBCVd	DE
96	20230526	17	0.4459	0.5154	0.4744	0.478567	8.02964	16.0593	20.8771	623.196	623.196	CBCVd	SL
97	20230526	9	0.2886	0.2859	0.2916	0.2887	4.84396	9.68792	12.5943	305.687	305.687	CBCVd	DE
98	20230526	2	0.4413	0.4499	0.4328	0.441333	7.40492	14.8098	19.2528	257.39	257.39	CBCVd	DE
99	20230526	15	0.2086	0.1525	0.168	0.176367	2.95917	5.91834	7.69385	168.356	168.356	Control	SL
100	20230526	20	0.6499	0.7536	0.7564	0.719967	12.08	24.16	31.4079	1023.06	1023.06	CBCVd	SL
101	20230526	2	0.1517	0.1477	0.1417	0.147033	2.467	4.934	6.41421	110.972	110.972	Control	DE
102	20230526	7	0.2297	0.2273	0.2258	0.2276	3.52322	7.04644	9.16037	156.054	156.054	Control	DE
103	20230526	16	0.516	0.5039	0.5031	0.507667	7.85862	15.7172	20.4324	231.136	231.136	CBCVd	SL
104	20230526	10	0.3391	0.329	0.3334	0.333833	5.1677	10.3354	13.436	193.324	193.324	Control	DE
105	20230526	15	0.8509	0.8555	0.8259	0.8441	13.0666	26.1331	33.9731	923.181	923.181	CBCVd	SL
106	20230526	11	0.3516	0.3417	0.3413	0.344867	5.33849	10.677	13.8801	380.276	380.276	CBCVd	SL
107	20230526	3	0.2087	0.2032	0.197	0.202967	3.1419	6.2838	8.16894	193.577	193.577	CBCVd	DE
108	20230526	1	0.2137	0.231	0.2243	0.223	3.45201	6.90402	8.97523	174.956	174.956	CBCVd	DE
109	20230526	5	0.4091	0.4038	0.392	0.401633	6.21723	12.4345	16.1648	212.695	212.695	CBCVd	DE
110	20230526	9	0.2413	0.2368	0.2279	0.235333	3.64293	7.28586	9.47162	121.9	121.9	Control	DE
111	20230526	14	0.9072	0.8862	0.8443	0.879233	13.6104	27.2208	35.3871	854.761	854.761	CBCVd	SL
112	20230526	12	0.2509	0.2323	0.2246	0.235933	3.65222	7.30444	9.49577	146.993	146.993	Control	SL
113	20230526	8	0.7049	0.6938	0.6745	0.691067	10.6976	21.3953	27.8138	408.426	408.426	CBCVd	DE
114	20230526	7	0.2204	0.21	0.2074	0.2126	3.29102	6.58204	8.55666	153.345	153.345	CBCVd	DE
115	20230526	12	0.2386	0.2363	0.2301	0.235	3.63777	7.27554	9.4582	214.959	214.959	CBCVd	SL
116	20230526	13	0.209	0.2102	0.209	0.2094	3.24149	6.48297	8.42786	144.313	144.313	CBCVd	SL
117	20230526	13	0.2775	0.2675	0.2539	0.2663	4.12229	8.24458	10.718	210.983	210.983	Control	SL
118	20230526	4	0.3073	0.3015	0.296	0.3016	4.66873	9.33746	12.1387	127.374	127.374	CBCVd	DE
119	20230526	18	0.2352	0.2312	0.2225	0.229633	3.5547	7.10939	9.24221	163.869	163.869	Control	SL
120	20230526	18	0.2655	0.2593	0.2501	0.2583	3.99845	7.9969	10.396	245.768	245.768	CBCVd	SL
121	20230526	6	0.2804	0.2759	0.256	0.270767	4.19143	8.38287	10.8977	122.446	122.446	Control	DE
122	20230616	7	0.3455	0.3471	0.3051	0.332567	5.62719	11.2544	14.6307	295.569	295.569	Control	DE
123	20230616	14	0.1606	0.1549	0.1589	0.158133	2.67569	5.35138	6.9568	268.602	268.602	Control	SL
124	20230616	15	0.2368	0.2248	0.2247	0.228767	3.87084	7.74168	10.0642	232.967	232.967	Control	SL
125	20230616	16	0.1696	0.168	0.1533	0.163633	2.76875	5.53751	7.19876	176.874	176.874	Control	SL
126	20230616	3	0.3244	0.2847	0.2885	0.2992	5.06261	10.1252	13.1628	166.197	166.197	CBCVd	DE
127	20230616	12	0.1938	0.1858	0.1676	0.1824	3.08629	6.17259	8.02437	175.204	175.204	CBCVd	SL
128	20230616	20	0.419	0.4118	0.3893	0.4067	6.88156	13.7631	17.892	192.181	192.181	Control	SL
129	20230616	5	0.2451	0.2422	0.2293	0.238867	4.04174	8.08347	10.5085	208.917	208.917	CBCVd	DE
130	20230616	16	0.4118	0.4026	0.3766	0.397	6.71743	13.4349	17.4653	197.795	197.795	CBCVd	SL
131	20230616	11	0.2048	0.2063	0.1963	0.202467	3.42583	6.85166	8.90716	181.04	181.04	CBCVd	SL
132	20230616	15	0.1969	0.1935	0.1867	0.192367	3.25494	6.50987	8.46283	141.756	141.756	CBCVd	SL
133	20230616	9	0.1702	0.181	0.1753	0.1755	2.96954	5.93909	7.72081	116.982	116.982	Control	DE
134	20230616	17	0.1509	0.151	0.1436	0.1485	2.51269	5.02538	6.53299	210.064	210.064	Control	SL
135	20230616	8	0.2693	0.2672	0.2605	0.265667	4.49521	8.99041	11.6875	225.628	225.628	Control	DE
136	20230616	10	0.2579	0.2565	0.2481	0.254167	4.30062	8.60124	11.1816	180.058	180.058	Control	DE
137	20230616	13	0.1464	0.1454	0.1363	0.1427	2.41455	4.8291	6.27783	172.943	172.943	Control	SL
138	20230616	18	0.213	0.2218	0.219	0.217933	3.68754	7.37507	9.58759	142.249	142.249	Control	SL
139	20230616	12	0.2691	0.2619	0.2563	0.262433	4.4405	8.88099	11.5453	181.816	181.816	Control	SL
140	20230616	14	0.225	0.2235	0.2119	0.220133	3.72476	7.44952	9.68438	224.696	224.696	CBCVd	SL
141	20230616	1	0.1347	0.1552	0.1296	0.139833	2.36605	4.73209	6.15172	136.402	136.402	Control	DE
142	20230616	11	0.3647	0.3585	0.3531	0.358767	6.65615	13.3123	17.306	341.341	341.341	Control	SL
143	20230616	2	0.2428	0.316	0.3448	0.3012	5.58813	11.1763	14.5291	164.543	164.543	Control	DE
144	20230616	7	0.1719	0.275	0.3153	0.254067	4.71367	9.42733	12.2555	151.677	151.677	CBCVd	DE
145	20230616	5	0.421	0.5029	0.5073	0.477067	8.85096	17.7019	23.0125	434.198	434.198	Control	DE
146	20230616	8	0.1567	0.2281	0.2749	0.2199	4.07978	8.15955	10.6074	185.444	185.444	CBCVd	DE
147	20230616	18	0.1165	0.1785	0.1954	0.163467	3.03278	6.06555	7.88522	179.618	179.618	CBCVd	SL
148	20230616	1	0.1596	0.2253	0.3136	0.232833	4.31973	8.63946	11.2313	206.838	206.838	CBCVd	DE
149	20230616	19	0.187	0.2734	0.2784	0.246267	4.56895	9.13791	11.8793	237.586	237.586	Control	SL
150	20230616	2	0.1701	0.2397	0.2458	0.218533	4.05442	8.10884	10.5415	163.181	163.181	CBCVd	DE
151	20230616	6	0.2232	0.2984	0.3188	0.280133	5.19728	10.3946	13.5129	248.857	248.857	Control	DE
152	20230616	4	0.1937	0.281	0.303	0.259233	4.80952	9.61905	12.5048	171.769	171.769	Control	DE
153	20230616	13	0.1447	0.2243	0.2787	0.2159	4.00557	8.01113	10.4145	178.025	178.025	CBCVd	SL
154	20230616	3	0.2931	0.3943	0.4214	0.3696	6.85714	13.7143	17.8286	311.144	311.144	Control	DE
155	20230616	10	0.1797	0.2353	0.2726	0.2292	4.25232	8.50464	11.056	234.238	234.238	CBCVd	DE
156	20230616	6	0.1526	0.2394	0.262	0.218	4.04453	8.08905	10.5158	205.788	205.788	CBCVd	DE
157	20230616	4	0.1738	0.2604	0.3037	0.245967	4.56339	9.12678	11.8648	253.522	253.522	CBCVd	DE
158	20230616	9	0.2813	0.2786	0.2943	0.284733	5.28262	10.5652	13.7348	259.637	259.637	CBCVd	DE
159	20230802	1	0.4078	0.4148	0.4105	0.411033	6.25621	12.5124	16.2662	159.943	159.943	CBCVd	DE
160	20230802	2	0.4548	0.4444	0.4558	0.451667	7.14662	14.2932	18.5812	217.324	217.324	CBCVd	DE
161	20230802	3	0.3952	0.3984	0.3862	0.393267	6.22257	12.4451	16.1787	213.158	213.158	CBCVd	DE
162	20230802	4	0.2844	0.2805	0.2754	0.2801	4.43196	8.86392	11.5231	160.266	160.266	CBCVd	DE
163	20230802	5	0.4173	0.4019	0.3997	0.4063	6.4288	12.8576	16.7149	289.686	289.686	CBCVd	DE
164	20230802	6	0.3093	0.3134	0.3105	0.311067	4.73465	9.4693	12.3101	195.398	195.398	CBCVd	DE
165	20230802	7	0.4758	0.4701	0.4584	0.4681	7.12481	14.2496	18.5245	260.176	260.176	CBCVd	DE
166	20230802	8	0.4994	0.4931	0.4852	0.492567	7.79378	15.5876	20.2638	241.236	241.236	CBCVd	DE
167	20230802	9	0.3533	0.3336	0.3294	0.338767	5.36023	10.7205	13.9366	189.356	189.356	CBCVd	DE
168	20230802	10	0.3533	0.3336	0.3294	0.338767	5.36023	10.7205	13.9366	189.356	189.356	CBCVd	DE
169	20230802	11	0.3647	0.357	0.3562	0.3593	5.68513	11.3703	14.7813	220.947	220.947	CBCVd	SL
170	20230802	12	0.3702	0.3683	0.3612	0.366567	5.5794	11.1588	14.5064	266.173	266.173	CBCVd	SL
171	20230802	13	0.2326	0.23	0.23	0.230867	3.51395	7.0279	9.13628	200.357	200.357	CBCVd	SL
172	20230802	14	0.2848	0.2809	0.2762	0.280633	4.4404	8.8808	11.545	156.014	156.014	CBCVd	SL
173	20230802	15	0.4316	0.431	0.4256	0.4294	6.7943	13.5886	17.6652	256.389	256.389	CBCVd	SL
174	20230802	16	0.2845	0.2797	0.2813	0.281833	4.45939	8.91878	11.5944	210.044	210.044	CBCVd	SL
175	20230802	17	NA	NA	NA	NA	NA	NA	NA	NA	NA	CBCVd	SL
176	20230802	18	0.3155	0.3048	0.3035	0.307933	4.68696	9.37392	12.1861	177.64	177.64	CBCVd	SL
177	20230802	19	0.2972	0.2876	0.2853	0.290033	4.58913	9.17827	11.9318	172.175	172.175	CBCVd	SL
178	20230802	20	NA	NA	NA	NA	NA	NA	NA	NA	NA	CBCVd	SL
179	20230802	1	0.5283	0.5101	0.5055	0.514633	7.83308	15.6662	20.366	168.872	168.872	Control	DE
180	20230802	2	0.4369	0.4384	0.4297	0.435	6.621	13.242	17.2146	222.699	222.699	Control	DE
181	20230802	3	0.3851	0.3961	0.3869	0.389367	5.92643	11.8529	15.4087	254.269	254.269	Control	DE
182	20230802	4	0.3245	0.3427	0.3371	0.334767	5.29694	10.5939	13.772	208.037	208.037	Control	DE
183	20230802	5	0.3778	0.3735	0.373	0.374767	5.92985	11.8597	15.4176	153.715	153.715	Control	DE
184	20230802	6	0.3335	0.3402	0.3412	0.3383	5.14916	10.2983	13.3878	188.827	188.827	Control	DE
185	20230802	7	0.3433	0.3382	0.3343	0.3386	5.3576	10.7152	13.9297	176.326	176.326	Control	DE
186	20230802	8	0.3202	0.3211	0.3107	0.317333	4.83004	9.66007	12.5581	180.692	180.692	Control	DE
187	20230802	9	0.2656	0.2634	0.2672	0.2654	4.19937	8.39873	10.9184	202.567	202.567	Control	DE
188	20230802	10	0.308	0.2988	0.3015	0.302767	4.79061	9.58122	12.4556	167.865	167.865	Control	DE
189	20230802	11	0.3806	0.3749	0.3665	0.374	5.69254	11.3851	14.8006	215.125	215.125	Control	SL
190	20230802	12	0.3487	0.3564	0.3502	0.351767	5.35413	10.7083	13.9208	278.415	278.415	Control	SL
191	20230802	13	0.3576	0.3603	0.3556	0.357833	5.66192	11.3238	14.721	190.686	190.686	Control	SL
192	20230802	14	0.364	0.3678	0.3569	0.3629	5.74209	11.4842	14.9294	269.484	269.484	Control	SL
193	20230802	15	0.4236	0.4077	0.4082	0.413167	6.28869	12.5774	16.3506	179.874	179.874	Control	SL
194	20230802	16	0.4641	0.4713	0.4551	0.4635	7.05479	14.1096	18.3425	272.953	272.953	Control	SL
195	20230802	17	0.3617	0.3628	0.3546	0.3597	5.69146	11.3829	14.7978	180.022	180.022	Control	SL
196	20230802	18	0.4053	0.3971	0.3943	0.3989	6.07154	12.1431	15.786	170.291	170.291	Control	SL
197	20230802	19	0.5225	0.512	0.5144	0.5163	7.85845	15.7169	20.432	259.618	259.618	Control	SL
198	20230802	20	0.3849	0.3872	0.387	0.386367	5.88077	11.7615	15.29	232.725	232.725	Control	SL
199	20230814	1	0.2082	0.2004	0.2029	0.203833	3.02873	6.05745	7.87469	109.828	109.828	CBCVd	DE
200	20230814	2	0.2669	0.2649	0.2628	0.264867	4.13854	8.27708	10.7602	153.498	153.498	CBCVd	DE
201	20230814	3	NA	NA	NA	NA	NA	NA	NA	NA	NA	CBCVd	DE
202	20230814	4	0.5415	0.5331	0.5267	0.533767	7.93115	15.8623	20.621	272.765	272.765	CBCVd	DE
203	20230814	5	0.2124	0.2048	0.2017	0.2063	3.06538	6.13076	7.96999	94.8808	94.8808	CBCVd	DE
204	20230814	6	0.1691	0.1636	0.1612	0.164633	2.44626	4.89252	6.36028	72.6059	72.6059	CBCVd	DE
205	20230814	7	0.2256	0.2186	0.2149	0.2197	3.43281	6.86563	8.92531	99.5018	99.5018	CBCVd	DE
206	20230814	8	0.296	0.293	0.2871	0.292033	4.33928	8.67855	11.2821	190.576	190.576	CBCVd	DE
207	20230814	9	0.2617	0.2658	0.2622	0.263233	4.11302	8.22604	10.6939	117.774	117.774	CBCVd	DE
208	20230814	10	0.2434	0.2364	0.2356	0.238467	3.54334	7.08668	9.21268	138.537	138.537	CBCVd	DE
209	20230814	11	0.2111	0.2054	0.2026	0.206367	3.22448	6.44896	8.38365	143.556	143.556	CBCVd	SL
210	20230814	12	0.1622	0.1657	0.1625	0.163467	2.42893	4.85785	6.31521	77.1087	77.1087	CBCVd	SL
211	20230814	13	0.2528	0.2473	0.2418	0.2473	3.86406	7.72812	10.0466	183.331	183.331	CBCVd	SL
212	20230814	14	0.2204	0.2167	0.217	0.218033	3.40677	6.81354	8.8576	137.115	137.115	CBCVd	SL
213	20230814	15	0.2144	0.209	0.2057	0.2097	3.27656	6.55312	8.51906	128.493	128.493	CBCVd	SL
214	20230814	16	0.2672	0.2557	0.2542	0.259033	4.0474	8.09479	10.5232	157.77	157.77	CBCVd	SL
215	20230814	17	NA	NA	NA	NA	NA	NA	NA	NA	NA	CBCVd	SL
216	20230814	18	0.2195	0.2223	0.2154	0.219067	3.42292	6.84583	8.89958	154.775	154.775	CBCVd	SL
217	20230814	19	0.2598	0.2583	0.2606	0.259567	4.05573	8.11146	10.5449	162.981	162.981	CBCVd	SL
218	20230814	20	NA	NA	NA	NA	NA	NA	NA	NA	NA	CBCVd	SL
219	20230814	1	0.2482	0.2417	0.2356	0.241833	3.59336	7.18673	9.34274	124.074	124.074	Control	DE
220	20230814	2	0.2493	0.2519	0.2465	0.249233	3.70332	7.40664	9.62863	93.5727	93.5727	Control	DE
221	20230814	3	0.1902	0.1874	0.1856	0.187733	2.7895	5.579	7.2527	89.319	89.319	Control	DE
222	20230814	4	0.3112	0.3179	0.3081	0.3124	4.6419	9.2838	12.0689	102.106	102.106	Control	DE
223	20230814	5	0.2706	0.2742	0.2682	0.271	4.02675	8.05349	10.4695	131.692	131.692	Control	DE
224	20230814	6	0.203	0.2029	0.1986	0.2015	2.99406	5.98811	7.78455	103.933	103.933	Control	DE
225	20230814	7	0.2602	0.2606	0.254	0.258267	4.03542	8.07083	10.4921	126.259	126.259	Control	DE
226	20230814	8	0.1857	0.1794	0.1749	0.18	2.67459	5.34918	6.95394	118.063	118.063	Control	DE
227	20230814	9	0.1845	0.1817	0.1745	0.180233	2.67806	5.35612	6.96295	122.803	122.803	Control	DE
228	20230814	10	0.1693	0.1715	0.1648	0.168533	2.50421	5.00842	6.51095	65.6345	65.6345	Control	DE
229	20230814	11	0.2256	0.2186	0.2149	0.2197	3.43281	6.86563	8.92531	71.7469	71.7469	Control	SL
230	20230814	12	0.2825	0.2833	0.2695	0.278433	4.1372	8.27439	10.7567	142.662	142.662	Control	SL
231	20230814	13	0.1445	0.1474	0.1481	0.146667	2.29167	4.58333	5.95833	131.241	131.241	Control	SL
232	20230814	14	0.2082	0.2004	0.2029	0.203833	3.02873	6.05745	7.87469	101.74	101.74	Control	SL
233	20230814	15	0.2113	0.2106	0.2069	0.2096	3.275	6.55	8.515	102.59	102.59	Control	SL
234	20230814	16	0.1737	0.1717	0.1707	0.172033	2.55622	5.11243	6.64616	83.7048	83.7048	Control	SL
235	20230814	17	0.2158	0.2217	0.222	0.219833	3.4349	6.86979	8.93073	167.556	167.556	Control	SL
236	20230814	18	0.2072	0.2123	0.2093	0.2096	3.275	6.55	8.515	148.345	148.345	Control	SL
237	20230814	19	0.1461	0.1504	0.1477	0.148067	2.31354	4.62708	6.01521	129.082	129.082	Control	SL
238	20230814	20	0.1631	0.1579	0.1565	0.159167	2.36503	4.73006	6.14908	91.9146	91.9146	Control	SL
